# Supplementary material for: A synergetic promotion of surface stability for high-voltage LiCoO2 by multi-element surface doping: a first-principles study
Source: Royal Society of Chemistry journal article supplement (doi:10.1039/d3cp04130a), 2024-01-01
Supplement: d3cp04130a1.pdf [file d3cp04130a1.pdf]

## Supporting Information

### **A synergetic promotion of surface stability for high-voltage LiCoO<sub>2</sub> by multi-element surface doping: a first-principles study**

Hongbin Lin,<sup>a</sup> Xiumei Kang,<sup>a</sup> Guigui Xu,<sup>\*ab</sup> Yue Chen,<sup>a</sup>  
Kehua Zhong,<sup>a</sup> Jian-Min Zhang<sup>a</sup> and Zhigao Huang<sup>\*a</sup>

*<sup>a</sup>Fujian Provincial Key Laboratory of Quantum Manipulation and New Energy Materials, College of Physics and Energy, Fujian Normal University, Fuzhou 350117, China*

*<sup>b</sup>Concord University College Fujian Normal University, Fuzhou 350117, China*

\*Author to whom correspondence should be addressed.

E-mail: xuguigui082@126.com (G. Xu); zghuang@fjnu.edu.cn (Z. Huang).

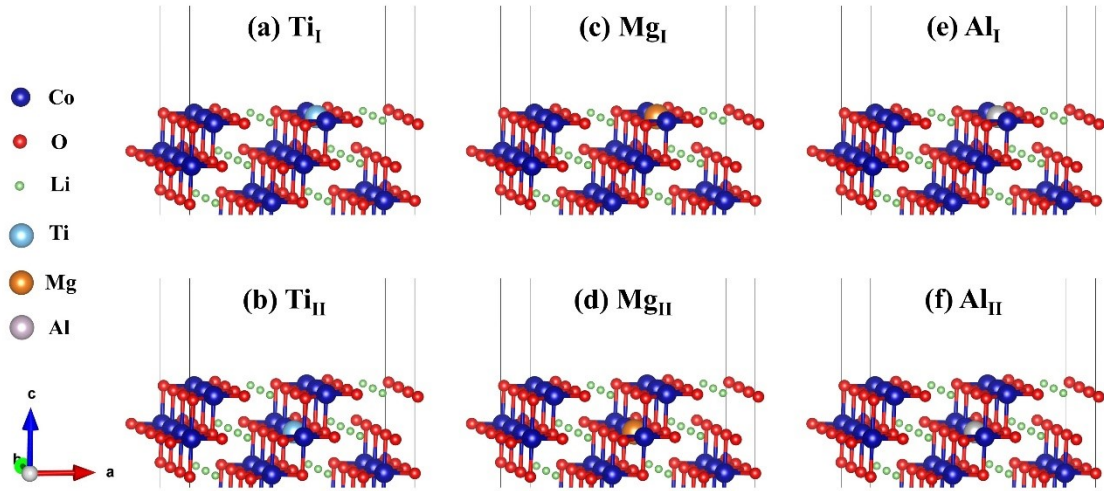

Fig. S1 Schematic illustrations of (a, b) two types of doping configurations for Ti-doped LiCoO<sub>2</sub> (104) surface, (c, d) two types of doping configurations for Mg-doped LiCoO<sub>2</sub> (104) surface and (e, f) two types of doping configurations for Al-doped LiCoO<sub>2</sub> (104) surface.

Table S1 Calculated formation energies ( $E_{form}$ ) and energy differences ( $\Delta E_{form}$ , relative to the surface layer doping configurations) of various doping configurations for Ti-doped, Mg-doped and Al-doped LiCoO<sub>2</sub> (104) surfaces.

| System                            | Doping configurations | Formation energy<br>$E_{form}$ (eV) | Energy difference<br>$\Delta E_{form}$ (eV) |
|-----------------------------------|-----------------------|-------------------------------------|---------------------------------------------|
| Ti-doped LiCoO <sub>2</sub> (104) | Ti <sub>I</sub>       | -2.50                               | 0                                           |
|                                   | Ti <sub>II</sub>      | -2.02                               | 0.48                                        |
| Mg-doped LiCoO <sub>2</sub> (104) | Mg <sub>I</sub>       | -3.65                               | 0                                           |
|                                   | Mg <sub>II</sub>      | -4.43                               | -0.78                                       |
| Al-doped LiCoO <sub>2</sub> (104) | Al <sub>I</sub>       | -5.75                               | 0                                           |
|                                   | Al <sub>II</sub>      | -7.99                               | -2.24                                       |

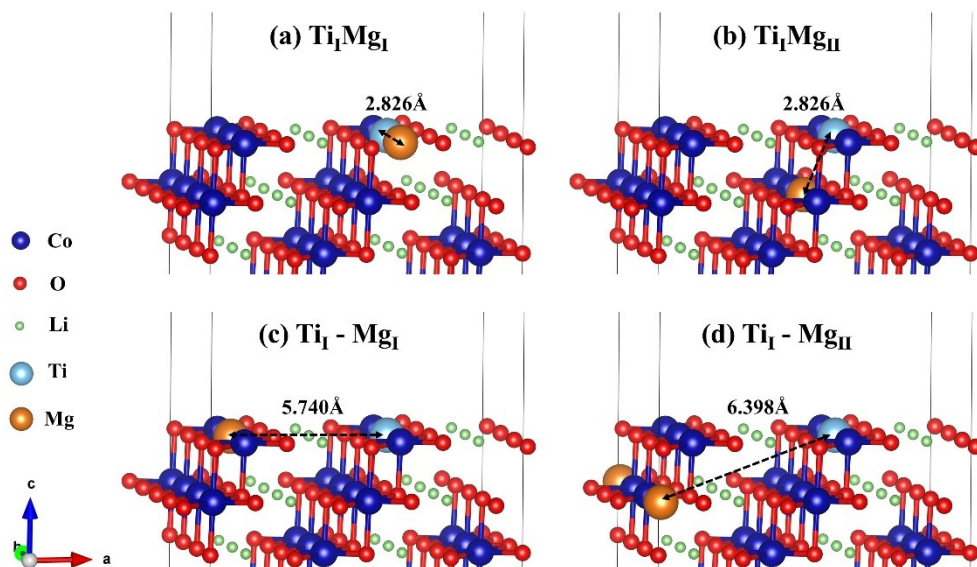

Fig. S2 Schematic illustrations of four types of doping configurations for Ti-Mg co-doped  $\text{LiCoO}_2$  (104) surface. The distances between nearest doping Ti and Mg at (104) surface are 2.826 Å, 2.826 Å, 5.740 Å and 6.398 Å in these four doping configurations respectively.

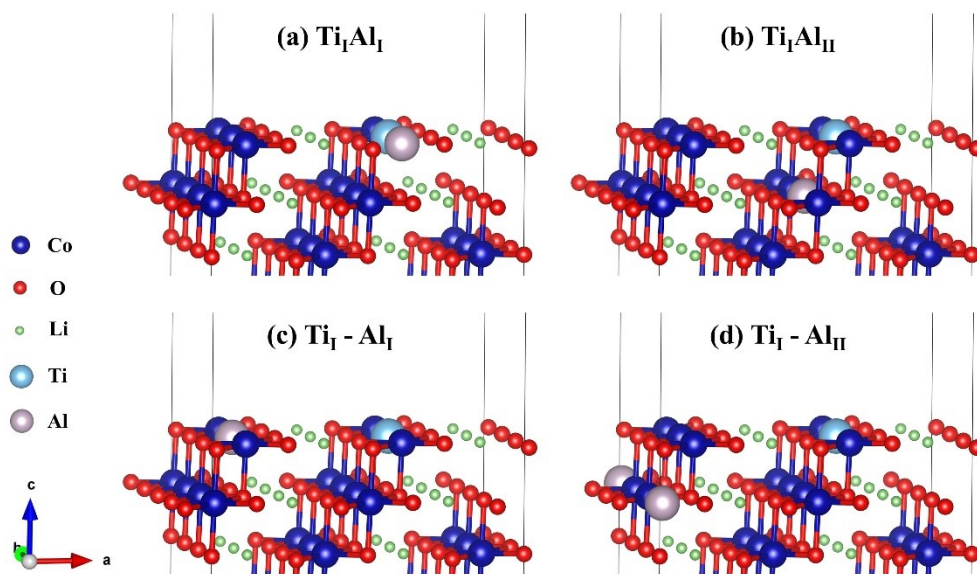

Fig. S3 Schematic illustrations of four types of doping configurations for Ti-Al co-doped  $\text{LiCoO}_2$  (104) surface.

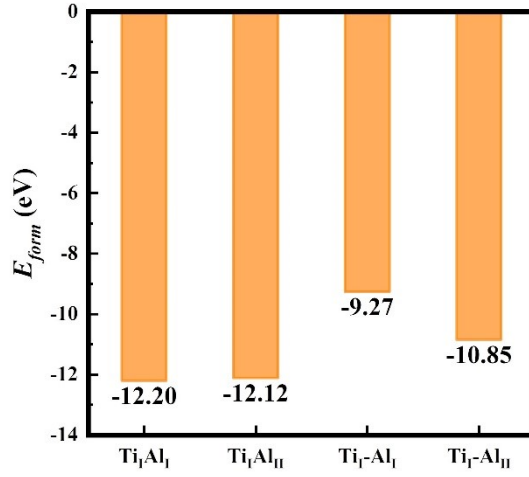

Fig.S4 Calculated formation energies ( $E_{form}$ ) of various doping configurations for Ti-Al co-doped LiCoO<sub>2</sub> (104) surface.

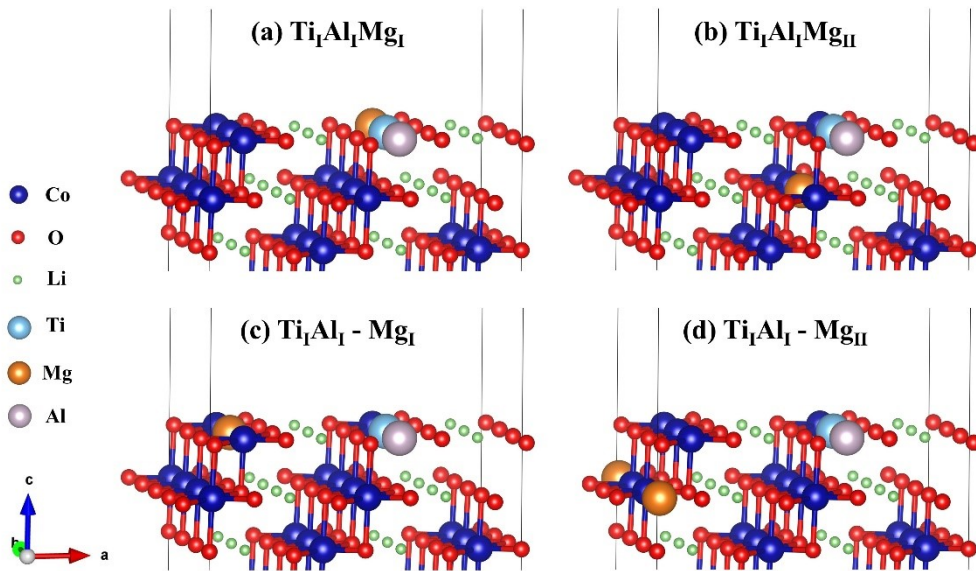

Fig. S5 Schematic illustrations of four types of doping configurations for Ti-Al-Mg co-doped LiCoO<sub>2</sub> (104) surface.

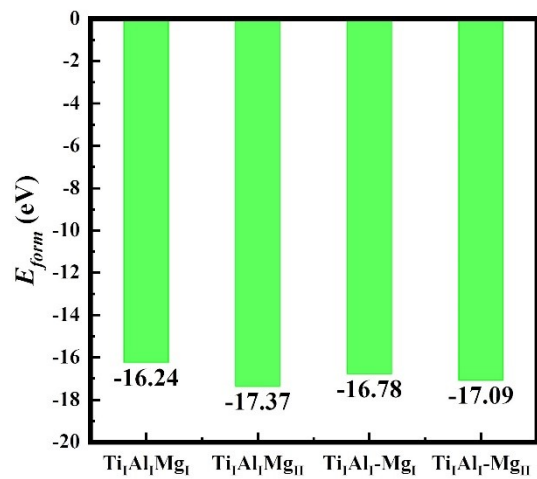

Fig. S6 Calculated formation energies ( $E_{form}$ ) of various doping configurations for Ti-Al-Mg co-doped  $LiCoO_2$  (104) surface.
